# Supplementary material
Source: ML conference proceedings conference paper supplement (https://proceedings.mlr.press/v89/laude19a.html)
Supplement: Supplementary file [file laude19a-supp.pdf]

## A Proofs

### A.1 Proof of Lemma 3.4

In parametric minimization problems, such as encountered in the definitions of  $\phi$ -prox and  $\phi$ -envelope, a sufficient condition for the continuity of the arg min map is given by uniform level boundedness [22, Definition 1.16 and Theorem 1.17] of the map  $h : (z, v) \mapsto f(z) + \frac{1}{\lambda}\phi(v - z)$ .

**Definition A.1** (uniform level boundedness). *We say a function  $h : \mathbb{R}^m \times \mathbb{R}^m \rightarrow \overline{\mathbb{R}}$  with values  $h(z, v)$  is level-bounded in  $z$  locally uniformly in  $v$  if for each  $\bar{v} \in \mathbb{R}^m$  and  $\alpha \in \mathbb{R}$  there is a neighborhood  $V$  of  $\bar{v}$  along with a bounded set  $X \subset \mathbb{R}^m$  such that*

$$\{z : h(z, v) \leq \alpha\} \subset X$$

for all  $v \in V$ .

In the next lemma we establish the uniform level boundedness of the map  $h : (z, v, \xi) \mapsto f(z) + \frac{1}{\lambda}\phi(v - z) - \langle \xi, z \rangle$  from  $\phi$ -prox-boundedness so that [22, Theorem 1.17] can be invoked to assert the continuity of  $\phi$ -prox and  $\phi$ -envelope. The Lemma is stated in a more general form including an additional linear term  $\langle \xi, z \rangle$ , which is needed later on in the proof of Theorem 4.3, see Section A.2.

**Lemma A.2.** *Let  $f : \mathbb{R}^m \rightarrow \overline{\mathbb{R}}$  be proper lsc and  $\phi$ -prox-bounded with threshold  $\lambda_f > 0$ . Then for any  $\lambda \in (0, \lambda_f)$ , the function  $h : \mathbb{R}^m \times \mathbb{R}^m \times \mathbb{R}^m \rightarrow \overline{\mathbb{R}}$ , defined via*

$$h(z, \xi, v) := f(z) + \frac{1}{\lambda}\phi(v - z) - \langle \xi, z \rangle,$$

is level-bounded in  $z$  locally uniformly in  $(\xi, v)$ .

*Proof.* We assume the contrary: More precisely let  $\lambda \in (0, \lambda_f)$  and assume that  $h$  is not level-bounded in  $z$  locally uniformly in  $v$ . On the one hand, this means that there exist  $\bar{v}, \bar{\xi} \in \mathbb{R}^m$ ,  $\alpha \in \mathbb{R}$  and sequences  $v^\nu \rightarrow \bar{v}$ ,  $\xi^\nu \rightarrow \bar{\xi}$  and  $z^\nu$ ,  $\|z^\nu\| \rightarrow \infty$  such that

$$f(z^\nu) + \frac{1}{\lambda}\phi(v^\nu - z^\nu) - \langle \xi^\nu, z^\nu \rangle \leq \alpha.$$

On the other hand, we know that

$$f(z^\nu) + \frac{1}{\lambda'}\phi(v^\nu - z^\nu) \geq \beta,$$

for some  $\lambda' > \lambda$ , with  $\lambda' \in (0, \lambda_f)$  and  $\nu$  sufficiently large. Summing the inequalities yields:

$$\left(\frac{1}{\lambda} - \frac{1}{\lambda'}\right)\phi(v^\nu - z^\nu) - \langle \xi^\nu, z^\nu \rangle \leq \alpha - \beta.$$

Due to the super-coercivity of  $\phi$ , for  $\nu \rightarrow \infty$  this yields  $\infty \leq \alpha - \beta$ , a contradiction.  $\square$

Now we are ready to prove Lemma 3.4 invoking [22, Theorem 1.17]:

**Lemma.** *Let  $f : \mathbb{R}^m \rightarrow \overline{\mathbb{R}}$  be proper lsc and  $\phi$ -prox-bounded with threshold  $\lambda_f > 0$ . Then for any  $\lambda \in (0, \lambda_f)$ ,  $P_\lambda^\phi f$  and  $e_\lambda^\phi f$  have the following properties:*

- (i)  $P_\lambda^\phi f(v) \neq \emptyset$  is compact for all  $v \in \text{dom } e_\lambda^\phi f = \text{dom } f + \text{dom } \phi$ , whereas  $P_\lambda^\phi f(v) = \emptyset$  for  $v \notin \text{dom } e_\lambda^\phi f$ .
- (ii) The  $\phi$ -envelope  $e_\lambda^\phi f$  is continuous relative to  $\text{dom } e_\lambda^\phi f$ .
- (iii) For any sequence  $v^\nu \rightarrow \bar{v}$  contained in  $\text{dom } e_\lambda^\phi f$  and  $z^\nu \in P_\lambda^\phi f(v^\nu)$  we have  $\{z^\nu\}_{\nu \in \mathbb{N}}$  is bounded and all its cluster points  $\bar{z}$  lie in  $P_\lambda^\phi f(\bar{v})$ .

*Proof.* Obviously it holds for the domain that  $\text{dom } e_\lambda^\phi f = \text{dom } f + \text{dom } \phi$ . In view of Lemma A.2 (with  $\xi = 0$ ) we assert that  $h : (z, v) \mapsto f(z) + \frac{1}{\lambda}\phi(v - z)$  is level-bounded in  $z$  locally uniformly in  $v$ . Then we may invoke [22, Theorem 1.17] to assert that  $P_\lambda^\phi f(v) \neq \emptyset$  is compact for any  $v \in \text{dom } e_\lambda^\phi f$  whereas  $P_\lambda^\phi f(v) = \emptyset$  for  $v \notin \text{dom } e_\lambda^\phi f$ .

and in addition for any  $\bar{v} \in \text{dom } e_\lambda^\phi f$  and any sequence  $z^\nu \in P_\lambda^\phi f(v^\nu)$  with  $v^\nu \rightarrow \bar{v}$  contained in  $\text{dom } e_\lambda^\phi f$ , that  $\{z^\nu\}_{\nu \in \mathbb{N}}$  is bounded. Furthermore, as  $\phi$  is continuous relative to its domain, we know for some  $\bar{z} \in P_\lambda^\phi f(\bar{v})$  that  $h(\bar{z}, \cdot)$  is continuous relative to  $\bar{z} + \text{dom } \phi$  containing  $\bar{v}$ . Through [22, Theorem 1.17] all cluster points of the sequence  $z^\nu \in P_\lambda^\phi f(v^\nu)$  lie in  $P_\lambda^\phi f(\bar{v})$  and  $e_\lambda^\phi f(v^\nu) \rightarrow e_\lambda^\phi f(\bar{v})$  and therefore  $e_\lambda^\phi f$  is continuous at  $\bar{v}$  relative to  $\text{dom } e_\lambda^\phi f$ . Since this holds for all  $\bar{v} \in \text{dom } e_\lambda^\phi f$ ,  $e_\lambda^\phi f$  is continuous relative to  $\text{dom } e_\lambda^\phi f$ .  $\square$

## A.2 Proof of Theorem 4.3

In order to prove the desired statement we need the following intermediate result. For the sake of notational convenience recall the notion of Bregman distances as a short-hand notation for  $\phi(w') - \phi(w) - \langle \nabla \phi(w), w' - w \rangle$ :

**Definition A.3** (Bregman distance). *The  $\phi$ -induced Bregman distance  $B_\phi : \mathbb{R}^m \times \mathbb{R}^m \rightarrow \bar{\mathbb{R}}$  is defined by*

$$B_\phi(w', w) = \begin{cases} \phi(w') - \phi(w) - \langle \nabla \phi(w), w' - w \rangle & \text{if } w \in \text{int}(\text{dom } \phi) \\ +\infty & \text{otherwise.} \end{cases} \quad (19)$$

**Lemma A.4.** *Let  $f : \mathbb{R}^m \rightarrow \bar{\mathbb{R}}$  proper lsc and  $\phi$ -prox-bounded with threshold  $\lambda_f$ . In addition assume that  $f$  is finite and prox-regular at  $\bar{z}$  for  $\bar{y} \in \partial f(\bar{z})$  such that the subgradient inequality (11) is satisfied by constants  $r > 0$  and  $\epsilon > 0$  and let  $\bar{v} \in \bar{z} + \text{dom } \phi$ . Then the following inequality holds for all  $z \in \mathbb{R}^m$  and  $r_1 \geq \max\{r, \lambda_f^{-1}\}$  sufficiently large:*

$$f(z) \geq f(\bar{z}) + \langle \bar{y}, z - \bar{z} \rangle - r_1 B_{\phi(\bar{v}-\cdot)}(z, \bar{z}). \quad (20)$$

*Proof.* By prox-regularity of  $f$  we know there exist  $r > 0$  and  $\epsilon > 0$  such that the subgradient inequality

$$f(z) \geq f(\bar{z}) + \langle \bar{y}, z - \bar{z} \rangle - \frac{r}{2} \|z - \bar{z}\|^2, \quad (21)$$

holds for  $\|z - \bar{z}\| < \epsilon$ . By Assumption (A3) and [4, Proposition 2.10] we have that

$$B_{\phi(\bar{v}-\cdot)}(z, \bar{z}) = \phi(\bar{v} - z) - \phi(\bar{v} - \bar{z}) + \langle \nabla \phi(\bar{v} - \bar{z}), z - \bar{z} \rangle \geq \frac{\mu}{2} \|z - \bar{z}\|^2, \quad (22)$$

for some  $\mu > 0$ . Summing (21) and (22) yields (20), which holds for any  $z$  with  $\|z - \bar{z}\| < \epsilon$  and  $r_1 \geq \frac{r}{\mu}$ . To show the assertion we prove that (20) also holds for any  $z$  with  $\|z - \bar{z}\| \geq \epsilon$  for  $r_1 \geq \max\{\frac{r}{\mu}, \lambda_f^{-1}\}$  sufficiently large. By  $\phi$ -prox-boundedness it holds for  $\lambda \in (0, \lambda_f)$  and  $\bar{v} \in \text{dom } e_\lambda^\phi f$  that  $+\infty > e_\lambda^\phi f(\bar{v}) > -\infty$ . We have

$$f(z) \geq e_\lambda^\phi f(\bar{v}) - \frac{1}{\lambda} \phi(\bar{v} - z), \quad (23)$$

showing, that the desired inequality (20) is implied by

$$e_\lambda^\phi f(\bar{v}) - \frac{1}{\lambda} \phi(\bar{v} - z) \geq f(\bar{z}) + \langle \bar{y}, z - \bar{z} \rangle - r_1 B_{\phi(\bar{v}-\cdot)}(z, \bar{z}),$$

which is equivalent to

$$(r_1 - \lambda^{-1}) B_{\phi(\bar{v}-\cdot)}(z, \bar{z}) \geq f(\bar{z}) - e_\lambda^\phi f(\bar{v}) + \langle \bar{y}, z - \bar{z} \rangle + \frac{1}{\lambda} \phi(\bar{v} - \bar{z}) - \frac{1}{\lambda} \langle \nabla \phi(\bar{v} - \bar{z}), z - \bar{z} \rangle,$$

and (using Cauchy-Schwarz) implied by

$$(r_1 - \lambda^{-1}) \frac{B_{\phi(\bar{v}-\cdot)}(z, \bar{z})}{\|z - \bar{z}\|} \geq \frac{f(\bar{z}) - e_\lambda^\phi f(\bar{v}) + \frac{1}{\lambda} \phi(\bar{v} - \bar{z})}{\|z - \bar{z}\|} + \|\bar{y} - \lambda^{-1} \nabla \phi(\bar{v} - \bar{z})\|. \quad (24)$$

Due to the super-coercivity of  $\phi$  (24) holds for  $z$  with  $\|z - \bar{z}\| \geq \gamma$  for some  $\gamma > 0$  sufficiently large. To make (24) also hold for  $z$  with  $\epsilon \leq \|z - \bar{z}\| < \gamma$  we can choose  $r_1 > \max\{r, \lambda_f^{-1}\}$  sufficiently large as  $B_{\phi(\bar{v}-\cdot)}(z, \bar{z})$  is bounded away from zero, due to the strict convexity of  $\phi(\bar{v} - \cdot)$ .  $\square$

Throughout the proof we work with graphical localizations of set-valued mappings  $F$ , which are constructed graphically by intersecting the graph of  $F$  with some neighborhood of some reference point  $(\bar{z}, \bar{y}) \in \text{gph } F$ :

**Definition A.5** (graphical localization). For  $F : \mathbb{R}^m \rightrightarrows \mathbb{R}^n$  and a pair  $(\bar{z}, \bar{y}) \in \text{gph } F$ , a graphical localization of  $F$  at  $\bar{z}$  for  $\bar{y}$  is a set-valued mapping  $T$  such that

$$\text{gph } T = (U \times V) \cap \text{gph } F$$

for some neighborhoods  $U$  of  $\bar{z}$  and  $V$  of  $\bar{y}$ , so that

$$T(z) := \begin{cases} F(z) \cap V & \text{if } z \in U, \\ \emptyset & \text{otherwise.} \end{cases} \quad (25)$$

In the proof of Theorem 4.3, we shall invoke the following generalized implicit function theorem specialized from [11, Theorem 2B.7], originally due to Robinson [20] for analyzing the solutions of parametric variational inequalities.

**Theorem A.6** (generalized implicit function theorem). Consider a function  $G : \mathbb{R}^m \times \mathbb{R}^m \rightarrow \mathbb{R}^m$  and a set-valued map  $T : \mathbb{R}^m \rightrightarrows \mathbb{R}^m$  with  $(\bar{v}, \bar{z}) \in \text{int dom } G$  and  $0 \in G(\bar{v}, \bar{z}) + T(\bar{z})$ , and suppose that

$$\widehat{\text{lip}}_v(G; (\bar{v}, \bar{z})) := \limsup_{\substack{v, v' \rightarrow \bar{v} \\ z \rightarrow \bar{z} \\ v \neq v'}} \frac{\|G(v, z) - G(v', z)\|}{\|v - v'\|} \leq \gamma < \infty.$$

Let  $H : \mathbb{R}^m \rightarrow \mathbb{R}^m$  be a strict estimator of  $G$  w.r.t.  $z$  uniformly in  $v$  at  $(\bar{v}, \bar{z})$  with constant  $\mu$ , i.e.,

$$\widehat{\text{lip}}_z(e; (\bar{v}, \bar{z})) \leq \mu < \infty \quad \text{for } e(v, z) = G(v, z) - H(z).$$

Suppose that  $(H + T)^{-1}$  has a Lipschitz continuous single-valued localization around 0 for  $\bar{z}$  with modulus  $\kappa$  and  $\kappa\mu < 1$ . Then the solution mapping

$$S : v \in \mathbb{R}^m \mapsto \{z \in \mathbb{R}^m : 0 \in G(v, z) + T(z)\}$$

has a Lipschitz continuous single-valued localization around  $\bar{v}$  for  $\bar{z}$  with modulus  $\frac{\kappa\gamma}{1-\kappa\mu}$ .

We are now ready to prove the desired statement Theorem 4.3:

**Theorem.** Let  $f : \mathbb{R}^m \rightarrow \overline{\mathbb{R}}$  proper lsc and  $\phi$ -prox-bounded with threshold  $\lambda_f$ . Let  $\bar{v} \in \bar{z} + \text{dom } \phi$ . Then for any  $\lambda \in (0, \lambda_f)$  sufficiently small and  $f$  finite and prox-regular at  $\bar{z}$  for  $\bar{y} \in \partial f(\bar{z})$  with

$$\bar{y} = \frac{1}{\lambda} \nabla \phi(\bar{v} - \bar{z})$$

the following statements hold true:

- (i)  $P_\lambda^\phi f$  is a single-valued, Lipschitz map near  $\bar{v}$  such that  $\bar{z} = P_\lambda^\phi f(\bar{v})$  and

$$P_\lambda^\phi f(v) = (I + \nabla \phi^* \circ \lambda T)^{-1}(v), \quad (26)$$

where  $T$  is the  $f$ -attentive  $\epsilon$ -localization of  $\partial f$  near  $(\bar{z}, \bar{y})$ , i.e. the set-valued mapping  $T : \mathbb{R}^m \rightrightarrows \mathbb{R}^m$  defined by  $T(z) := \{y \in \partial f(z) : \|y - \bar{y}\| < \epsilon\}$  if  $\|z - \bar{z}\| < \epsilon$  and  $f(z) < f(\bar{z}) + \epsilon$ , and  $T(z) := \emptyset$  otherwise.

- (ii)  $e_\lambda^\phi f$  is Lipschitz differentiable around  $\bar{v}$  with

$$\nabla e_\lambda^\phi f(v) = \frac{1}{\lambda} \nabla \phi(v - z). \quad (27)$$

*Proof.* (i) Due to the prox-regularity at  $\bar{z}$  for  $\bar{y}$  with constants  $\epsilon > 0$  and  $r > 0$  and the  $\phi$ -prox-boundedness of  $f$  with threshold  $\lambda_f$  we can invoke Lemma A.4 to assert that for some  $\lambda \in (0, \min\{\lambda_f, r^{-1}\})$  sufficiently small the following inequality holds globally for all  $z \neq \bar{z}$ :

$$f(z) + \frac{1}{\lambda} \phi(\bar{v} - z) > f(\bar{z}) + \frac{1}{\lambda} \phi(\bar{v} - \bar{z}) + \langle \bar{y}, z - \bar{z} \rangle - \frac{1}{\lambda} \langle \nabla \phi(\bar{v} - \bar{z}), z - \bar{z} \rangle. \quad (28)$$

By assumption  $\bar{y} = \frac{1}{\lambda} \nabla \phi(\bar{v} - \bar{z})$  showing that

$$f(z') + \frac{1}{\lambda} \phi(\bar{v} - z') > f(\bar{z}) + \frac{1}{\lambda} \phi(\bar{v} - \bar{z}),$$

for any  $z' \neq \bar{z}$ . Therefore we can assert  $P_\lambda^\phi f(\bar{v}) = \bar{z}$ .

Due to the  $\phi$ -prox-boundedness of  $f$  and the coercivity of  $\phi$  we can invoke Lemma A.2 to assert that  $h(z, v) := f(z) + \frac{1}{\lambda} \phi(v - z)$  is level-bounded in  $z$  locally uniformly in  $v$ . By Lemma 3.4 it follows that  $P_\lambda^\phi f(v) \neq \emptyset$  for any  $v \in \text{dom } e_\lambda^\phi f$ . Furthermore, we assert, that for any sequence  $z^\nu \in P_\lambda^\phi f(v^\nu)$ ,  $v^\nu \rightarrow \bar{v}$  we have  $\{z^\nu\}$  is bounded and all its cluster points lie in  $P_\lambda^\phi f(\bar{v}) = \bar{z}$ , meaning  $z^\nu \rightarrow \bar{z}$  and  $e_\lambda^\phi f(v^\nu) \rightarrow e_\lambda^\phi f(\bar{v})$ . In addition, we have  $f(z^\nu) \rightarrow f(\bar{z})$  as  $e_\lambda^\phi f(v^\nu) = f(z^\nu) + \frac{1}{\lambda} \phi(v^\nu - z^\nu) \rightarrow e_\lambda^\phi f(\bar{v}) = f(\bar{z}) + \frac{1}{\lambda} \phi(\bar{v} - \bar{z})$ . Overall this shows, that for any  $v$ , sufficiently near  $\bar{v}$  we have  $z \in P_\lambda^\phi f(v)$ ,  $\|z - \bar{z}\| < \epsilon$ ,  $|f(z) - f(\bar{z})| < \epsilon$  and  $\|\frac{1}{\lambda} \nabla \phi(v - z) - \bar{y}\| < \epsilon$ , due to the continuity of  $\nabla \phi$  on a neighborhood of  $\bar{v} - \bar{z}$ . From applying Fermat's rule [22, Theorem 10.1] to  $P_\lambda^\phi f(v)$  we obtain

$$\frac{1}{\lambda} \nabla \phi(v - z) \in \partial f(z),$$

and we can assert that  $\frac{1}{\lambda} \nabla \phi(v - z) \in T(z)$  via the arguments above. This shows that

$$\emptyset \neq P_\lambda^\phi f(v) \subset \left( T - \frac{1}{\lambda} \nabla \phi(v - \cdot) \right)^{-1} (0), \quad (29)$$

where  $\partial f$  is replaced by  $T$ . It is straightforward to verify, using the fact  $(\nabla \phi)^{-1} = \nabla \phi^*$  from Lemma 3.2, that

$$\left( T - \frac{1}{\lambda} \nabla \phi(v - \cdot) \right)^{-1} (0) = (I + \nabla \phi^* \circ \lambda T)^{-1}(v).$$

We proceed showing that  $(I + \nabla \phi^* \circ \lambda T)^{-1}$  is a single-valued Lipschitz map in a neighborhood of  $\bar{v}$ . Via the inclusion above this means that  $P_\lambda^\phi f = (I + \nabla \phi^* \circ \lambda T)^{-1}$  on this neighborhood.

To this end, consider the function  $h : \mathbb{R}^m \times \mathbb{R}^m \times \mathbb{R}^m \rightarrow \bar{\mathbb{R}}$  defined via  $h(v, \xi, z) := f(z) + \frac{1}{\lambda} \phi(v - z) - \langle \xi, z \rangle$ . In view of Lemma A.2 we assert that  $h(v, \xi, z)$  is level-bounded in  $z$  locally uniformly in  $(v, \xi)$ . Through [22, Theorem 1.17] we know that for any sequence  $\xi^\nu \rightarrow 0$  with  $\inf_{z \in \mathbb{R}^m} h(\bar{v}, \xi^\nu, z) < \infty$  there is  $z^\nu \in \arg \min_{z \in \mathbb{R}^m} h(\bar{v}, \xi^\nu, z) \neq \emptyset$  with  $z^\nu \rightarrow \bar{z} = \arg \min_{z \in \mathbb{R}^m} h(\bar{v}, 0, z) = P_\lambda^\phi f(\bar{v})$  and  $\inf_{z \in \mathbb{R}^m} h(\bar{v}, \xi^\nu, z) \rightarrow \inf_{z \in \mathbb{R}^m} h(\bar{v}, 0, z) = e_\lambda^\phi f(\bar{v})$ .

From applying Fermat's rule [22, Theorem 10.1] to the minimization problem above we know that  $\xi^\nu + \frac{1}{\lambda} \nabla \phi(\bar{v} - z^\nu) \in \partial f(z^\nu)$  and for  $\nu$  sufficiently large we have that  $\|\xi^\nu + \frac{1}{\lambda} \nabla \phi(\bar{v} - z^\nu) - \bar{y}\| \leq \epsilon$  due to the continuity of  $\nabla \phi$  on a neighborhood of  $\bar{v} - \bar{z}$ . In addition, we have  $f(z^\nu) \rightarrow f(\bar{z})$  as  $\inf_{z \in \mathbb{R}^m} h(\bar{v}, \xi^\nu, z) = f(z^\nu) + \frac{1}{\lambda} \phi(\bar{v} - z^\nu) - \langle \xi^\nu, z^\nu \rangle \rightarrow e_\lambda^\phi f(\bar{v}) = f(\bar{z}) + \frac{1}{\lambda} \phi(\bar{v} - \bar{z})$ . Overall this means that for any  $\xi$  sufficiently near 0 we have:

$$\xi \in T(z) - \frac{1}{\lambda} \nabla \phi(\bar{v} - z),$$

for some  $z$  near  $\bar{z}$ , and  $\partial f$  is interchangeable with  $T$ .

Now pick any  $(z^1, y^1), (z^2, y^2) \in \text{gph } T$ . Then it follows from (11) that

$$f(z^2) \geq f(z^1) + \langle y^1, z^2 - z^1 \rangle - \frac{r}{2} \|z^2 - z^1\|^2, \quad (30)$$

$$f(z^1) \geq f(z^2) + \langle y^2, z^1 - z^2 \rangle - \frac{r}{2} \|z^1 - z^2\|^2, \quad (31)$$

and furthermore, due to Assumption (A3) and [4, Proposition 2.10] we have that

$$B_{\phi(\bar{v}-\cdot)}(z^2, z^1) = \phi(\bar{v} - z^2) - \phi(\bar{v} - z^1) + \langle \nabla \phi(\bar{v} - z^1), z^2 - z^1 \rangle \geq \frac{\mu}{2} \|z^2 - z^1\|^2.$$

for some  $\mu > 0$ . Then we have

$$\phi(\bar{v} - z^2) \geq \phi(\bar{v} - z^1) - \langle \nabla \phi(\bar{v} - z^1), z^2 - z^1 \rangle + \frac{\mu}{2} \|z^2 - z^1\|^2, \quad (32)$$

$$\phi(\bar{v} - z^1) \geq \phi(\bar{v} - z^2) - \langle \nabla \phi(\bar{v} - z^2), z^1 - z^2 \rangle + \frac{\mu}{2} \|z^1 - z^2\|^2. \quad (33)$$

Summing the four inequalities yields for  $\xi^1 := y^1 - \frac{1}{\lambda}\nabla\phi(\bar{v} - z^1)$  and  $\xi^2 := y^2 - \frac{1}{\lambda}\nabla\phi(\bar{v} - z^2)$ :

$$\langle z^1 - z^2, \xi^1 - \xi^2 \rangle \geq \left(\frac{\mu}{\lambda} - r\right) \|z^1 - z^2\|^2, \quad (34)$$

Consequently, the map  $T - \frac{1}{\lambda}\nabla\phi(\bar{v} - \cdot)$  is  $(\frac{\mu}{\lambda} - r)$ -strongly monotone.

Define  $H(z) := -\frac{1}{\lambda}\nabla\phi(\bar{v} - z)$ ,  $G(v, z) := -\frac{1}{\lambda}\nabla\phi(v - z)$  and  $e(v, z) := G(v, z) - H(z)$ . Then the above argument implies that  $\xi \mapsto (T + H)^{-1}(\xi)$  is a single-valued,  $(\frac{\mu}{\lambda} - r)^{-1}$ -Lipschitz map in a neighbourhood of 0 such that  $0 \in T(\bar{z}) + G(\bar{v}, \bar{z})$ . Due to Assumption (A3) and [4, Proposition 2.10]  $\nabla\phi$  is Lipschitz on a neighbourhood of  $\bar{v} - \bar{z} \in \text{int dom } \phi$  and we may conclude that  $\widehat{\text{lip}}_v(G; (\bar{v}, \bar{z}))$  and  $\widehat{\text{lip}}_z(e; (\bar{v}, \bar{z}))$  are finite. This implies that  $H$  is a strict estimator of  $G$  w.r.t.  $z$  uniformly in  $v$  at  $(\bar{v}, \bar{z}) \in \text{int dom } G$ . Invoking Theorem A.6, we assert that  $v \mapsto \{z \in \mathbb{R}^m : 0 \in G(v, z) + T(z)\}$  has a single-valued, Lipschitz localization around  $\bar{v}$  for  $\bar{z}$ . Since  $\bar{z} = P_\lambda^\phi f(\bar{v})$  is single-valued at  $\bar{v}$  and for any  $v$  near  $\bar{v}$  and  $z \in P_\lambda^\phi f(v)$  it holds that  $z$  is near  $\bar{z}$ , we may conclude that  $P_\lambda^\phi f(v) = \{z \in \mathbb{R}^m : 0 \in G(v, z) + T(z)\}$  is single-valued and Lipschitz on a neighborhood of  $\bar{v}$ .

(ii) Let  $(z, v)$ ,  $(z', v')$  be sufficiently close to  $(\bar{z}, \bar{v})$  with  $z = P_\lambda^\phi f(v)$ ,  $z' = P_\lambda^\phi f(v')$ . Then, by Fermat's rule [22, Theorem 10.1] it holds  $y \in \partial f(z)$  such that  $y = \frac{1}{\lambda}\nabla\phi(v - z)$ . Furthermore, by assumption the subgradient inequality (11) holds true at  $(z, y) \in \text{gph } T$ . This means in particular that  $y$  is a proximal subgradient [22, Definition 8.45] of  $f$  at  $z$ . In view of [22, Proposition 8.46 (e)], we assert  $y \in \hat{\partial}f(z)$ . Thus (and using the differentiability of  $\phi$  on  $\text{dom } \phi$ ) one can derive

$$\begin{aligned} e_\lambda^\phi f(v') - e_\lambda^\phi f(v) &= f(z') - f(z) + \frac{1}{\lambda}\phi(v' - z') - \frac{1}{\lambda}\phi(v - z) \\ &\geq \langle y, z' - z \rangle + o(\|z' - z\|) + \frac{1}{\lambda} \langle \nabla\phi(v - z), (v' - v) - (z' - z) \rangle + o(\|(v' - v) - (z' - z)\|). \end{aligned} \quad (35)$$

Using the conclusion from (i) that  $v \mapsto z$  is a Lipschitz map near  $\bar{v}$  there is some  $\alpha$  such that

$$\|z' - z\| \leq \alpha \|v' - v\|.$$

This shows that  $o(\|(v' - v) - (z' - z)\|) + o(\|z' - z\|) = o(\|v' - v\|)$  and we get from (35) that

$$e_\lambda^\phi f(v') - e_\lambda^\phi f(v) - \frac{1}{\lambda} \langle \nabla\phi(v - z), v' - v \rangle \geq o(\|v' - v\|). \quad (36)$$

On the other hand, we have

$$e_\lambda^\phi f(v') = \inf_{z''} f(z'') + \frac{1}{\lambda}\phi(v' - z'') \leq f(z) + \frac{1}{\lambda}\phi(v' - z). \quad (37)$$

Due to the differentiability of  $\phi$ , we have

$$\phi(v' - z) = \phi(v - z) + \langle \nabla\phi(v - z), v' - v \rangle + o(\|v' - v\|). \quad (38)$$

This yields

$$\begin{aligned} e_\lambda^\phi f(v') - e_\lambda^\phi f(v) &\leq f(z) + \frac{1}{\lambda}\phi(v' - z) - f(z) - \frac{1}{\lambda}\phi(v - z) \\ &= \frac{1}{\lambda} \langle \nabla\phi(v - z), v' - v \rangle + o(\|v' - v\|). \end{aligned} \quad (39)$$

Combining (36) and (39), we conclude that  $e_\lambda^\phi f$  is differentiable at  $v$  and  $\frac{1}{\lambda}\nabla\phi(v - z) = \nabla e_\lambda^\phi f(v)$ . Since furthermore  $\nabla\phi$  is Lipschitz around  $\bar{v} - \bar{z}$  it holds that  $\nabla e_\lambda^\phi f$  is the composition of two locally Lipschitz maps and therefore Lipschitz around  $\bar{v}$ .  $\square$

## References

- [1] H. Attouch, J. Bolte, P. Redont, and A. Soubeyran. Proximal alternating minimization and projection methods for nonconvex problems: An approach based on the Kurdyka-Lojasiewicz inequality. *Mathematics of Operations Research*, 35:438–457, 2010.

- [2] A. Auslender. *Optimisation: Méthodes Numériques*. Masson, 1976.
- [3] H. H. Bauschke, J. M. Borwein, and P. L. Combettes. Bregman monotone optimization algorithms. *SIAM Journal on Control and Optimization*, 42(2):596–636, 2003.
- [4] H. H. Bauschke and A. S. Lewis. Dykstras algorithm with Bregman projections: A convergence proof. *Optimization*, 48(4):409–427, 2000.
- [5] D. P. Bertsekas and J. N. Tsitsiklis. *Parallel and Distributed Computation: Numerical Methods*. Prentice-Hall, Inc., Upper Saddle River, NJ, USA, 1989.
- [6] J. Bolte, S. Sabach, and M. Teboulle. Proximal alternating linearized minimization for nonconvex and nonsmooth problems. *Mathematical Programming*, 146(1-2):459–494, 2014.
- [7] Y. Censor and S. A. Zenios. Proximal minimization algorithm with D-functions. *Journal of Optimization Theory and Applications*, 73(3):451–464, 1992.
- [8] P. Chaudhari, A. Oberman, S. Osher, S. Soatto, and G. Carlier. Deep relaxation: partial differential equations for optimizing deep neural networks. *Research in the Mathematical Sciences*, 5(3):30, 2018.
- [9] P. L. Combettes and N. N. Reyes. Moreau’s decomposition in Banach spaces. *Mathematical Programming*, 139(1-2):103–114, 2013.
- [10] Damek Davis and Dmitriy Drusvyatskiy. Stochastic model-based minimization of weakly convex functions. *SIAM Journal on Optimization*, 29(1):207–239, 2019.
- [11] A. L. Dontchev and R. T. Rockafellar. *Implicit Functions and Solution Mappings: A View From Variational Analysis*. Springer, New York, 2009.
- [12] E. Laude, T. Wu, and D. Cremers. A nonconvex proximal splitting algorithm under Moreau-Yosida regularization. In *Artificial Intelligence and Statistics (AISTATS)*, 2018.
- [13] Y. LeCun, L. Bottou, Y. Bengio, and P. Haffner. Gradient-based learning applied to document recognition. *Proceedings of the IEEE*, 86(11):2278–2324, 1998.
- [14] C. Lescarret. Applications “prox” dans un espace de Banach. *Comptes Rendus de l’Académie des Sciences de Paris Série A*, 265:676–678, 1967.
- [15] A. S. Lewis, D. R. Luke, and J. Malick. Local linear convergence for alternating and averaged nonconvex projections. *Foundations of Computational Mathematics*, 9(4):485–513, 2009.
- [16] J.-J. Moreau. Fonctions convexes duales et points proximaux dans un espace Hilbertien. *Comptes Rendus de l’Académie des Sciences de Paris Série A*, 255:2897–2899, 1962.
- [17] J.-J. Moreau. Proximité et dualité dans un espace hilbertien. *Bulletin de la Société Mathématique de France*, 93(2):273–299, 1965.
- [18] P. Ochs. Local convergence of the heavy-ball method and iPiano for non-convex optimization. *Journal of Optimization Theory and Applications*, 177:153–180, 2018.
- [19] R. A. Poliquin and R. T. Rockafellar. Prox-regular functions in variational analysis. *Trans. Amer. Math. Soc.*, 348:1805–1838, 1996.
- [20] S. M. Robinson. Strongly regular generalized equations. *Mathematics of Operations Research*, 5:43–62, 1980.
- [21] R. T. Rockafellar. *Convex Analysis*. Princeton University Press, New Jersey, 1970.
- [22] R. T. Rockafellar and R. J.-B. Wets. *Variational Analysis*. Springer, New York, 1998.
- [23] I. Sutskever, J. Martens, G. Dahl, and G. Hinton. On the importance of initialization and momentum in deep learning. In *International Conference on Machine Learning (ICML)*, pages 1139–1147, 2013.
- [24] M. Teboulle. Entropic proximal mappings with applications to nonlinear programming. *Mathematics of Operations Research*, 17(3):670–690, 1992.

- [25] P. Tseng. Convergence of a block coordinate descent method for nondifferentiable minimization. *Journal of Optimization Theory and Applications*, 109(3):475–494, 2001.
- [26] D. Wexler. Prox-mappings associated with a pair of Legendre conjugate functions. *Revue française d'automatique informatique recherche opérationnelle*, 7(R2):39–65, 1973.
- [27] S. Zhang, A. Choromanska, and Y. LeCun. Deep learning with elastic averaging SGD. In *Advances in Neural Information Processing Systems (NIPS)*, pages 685–693, 2015.
